# Supplementary material for: Engineering bioactive nanoparticles to rejuvenate vascular progenitor cells
Source: PubMed Central journal article supplement (PMC9243106; doi:10.1038/s42003-022-03578-4), 2022-06-29
Supplement: 42003_2022_3578_MOESM3_ESM.pdf [file 42003_2022_3578_MOESM3_ESM.pdf]

## Description of Additional Supplementary Files

**File name:** Supplementary Data 1

**Description:** The source data behind the graphs in the paper.

**File name:** Supplementary Movie 1

**Description:** Wound healing assay for ECFCs conjugated with Vh-NP. The source data behind Figure 4c-e

**File name:** Supplementary Movie 2

**Description:** Wound healing assay for ECFCs conjugated with SB-NP. The source data behind Figure 4c-e

**File name:** Supplementary Movie 3

**Description:** Wound healing assay for GDMECFs conjugated with Vh-NP. The source data behind Figure 4c-e

**File name:** Supplementary Movie 4

**Description:** Wound healing assay for GDMECFs conjugated with SB-NP. The source data behind Figure 4c-e

**File name:** Supplementary Movie 5

**Description:** Tube formation assay for ECFCs conjugated with Vh-NP. The source data behind Figure 5a-c

**File name:** Supplementary Movie 6

**Description:** Tube formation assay for ECFCs conjugated with SB-NP. The source data behind Figure 5a-c

**File name:** Supplementary Movie 7

**Description:** Tube formation assay for GDMECFs conjugated with Vh-NP. The source data behind Figure 5a-c

**File name:** Supplementary Movie 8

**Description:** Tube formation assay for GDMECFs conjugated with SB-NP. The source data behind Figure 5a-c
